# Supplementary material for: Carbon nanofibers supported molybdenum carbide catalysts for hydrodeoxygenation of vegetable oils
Source: Royal Society of Chemistry journal article supplement (doi:10.1039/c3ra42434k), 2013-01-01
Supplement: c3ra42434k.pdf [file c3ra42434k.pdf]

## Supporting Information

### Carbon Nanofibers Supported Molybdenum Carbide Catalysts for Transformation of Vegetable Oils

Yu Qin,<sup>a</sup> Ping Chen,<sup>a</sup> Jinzhao Duan,<sup>a</sup> Junxing Han,<sup>a</sup> Hui Lou\*<sup>a</sup>, Xiaoming Zheng,<sup>a</sup> and Haiping Hong<sup>b</sup>

<sup>a</sup> Institute of Catalysis, Department of Chemistry, Zhejiang University, Hangzhou, 310028, P. R. China. Tel: +86-571-88273283; E-mail: [hx215@zju.edu.cn](mailto:hx215@zju.edu.cn)

<sup>b</sup> Department of Material and Metallurgical Engineering, South Dakota School of Mines and Technology, Rapid City, SD 57701, USA

#### Table of contents

**Table S1.** The average relative molecular weights of vegetable oils.

**Fig S1.** SEM of raw CNFs.

**Fig S2.** XRD pattern of (a) Mo<sub>2</sub>C/CNF catalyst, (b) Mo<sub>2</sub>C/AC catalyst and (c) Mo<sub>2</sub>C/CNT catalyst.

**Fig S3.** HAADF-STEM images of Mo<sub>2</sub>C nanoparticles (a) outside of and (b) inside of CNFs.

**Table S1.** The average relative molecular weights of vegetable oils.

| Feedstock     | M(average) |
|---------------|------------|
| Soya Bean Oil | 876        |
| Rapeseed Oil  | 880        |
| Maize Oil     | 874        |
| Sunflower Oil | 870        |
| Olive Oil     | 875        |

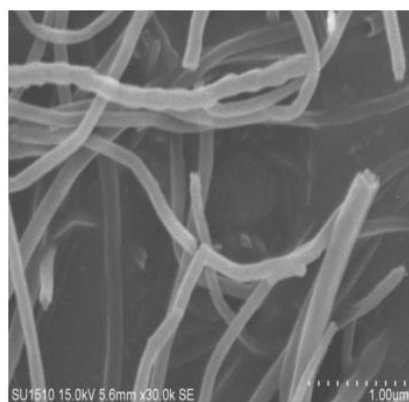

**Fig S1.** SEM of raw CNFs.

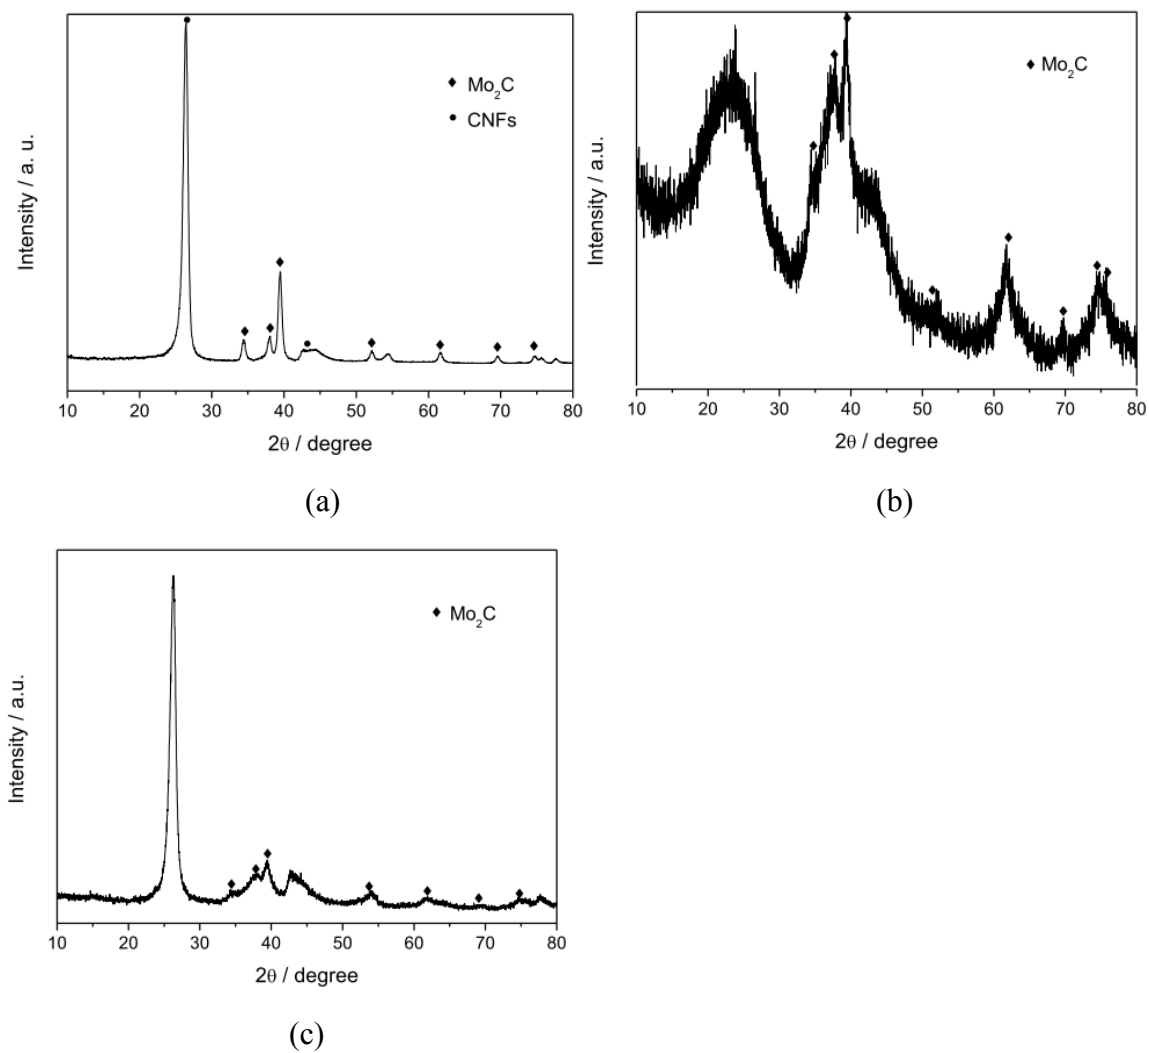

**Fig S2.** XRD patterns of (a)  $\text{Mo}_2\text{C}/\text{CNF}$  catalyst, (b)  $\text{Mo}_2\text{C}/\text{AC}$  catalyst and (c)  $\text{Mo}_2\text{C}/\text{CNT}$  catalyst.

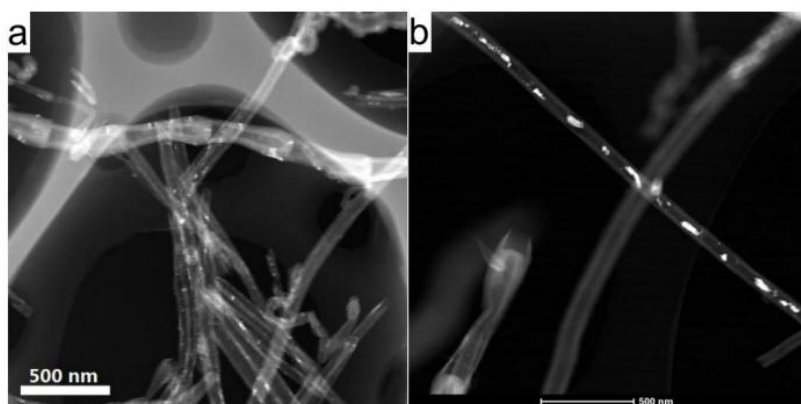

**Fig S3.** HAADF-STEM images of Mo<sub>2</sub>C nanoparticles (a) outside of and (b) inside of CNFs.
